# Supplementary material for: A novel protocol to derive cervical motor neurons from induced pluripotent stem cells for amyotrophic lateral sclerosis
Source: PubMed Central journal article supplement — Stem Cell Reports. 2023 Aug 17;18(9):1870–83. doi: 10.1016/j.stemcr.2023.07.004 (PMC10545486; doi:10.1016/j.stemcr.2023.07.004), 2023-08-17
Supplement: mmc1.pdf [file mmc1.pdf]

**Stem Cell Reports, Volume 18**

**Supplemental Information**

**A novel protocol to derive cervical motor neurons from induced pluripotent stem cells for amyotrophic lateral sclerosis**

**Meimei Yang, Min Liu, Yajaira Feller Sánchez, Sahar Avazzadeh, Leo R. Quinlan, Gang Liu, Yin Lu, Guangming Yang, Timothy O'Brien, David C. Henshall, Orla Hardiman, and Sanbing Shen**

## Supplementary information

### Figure S1

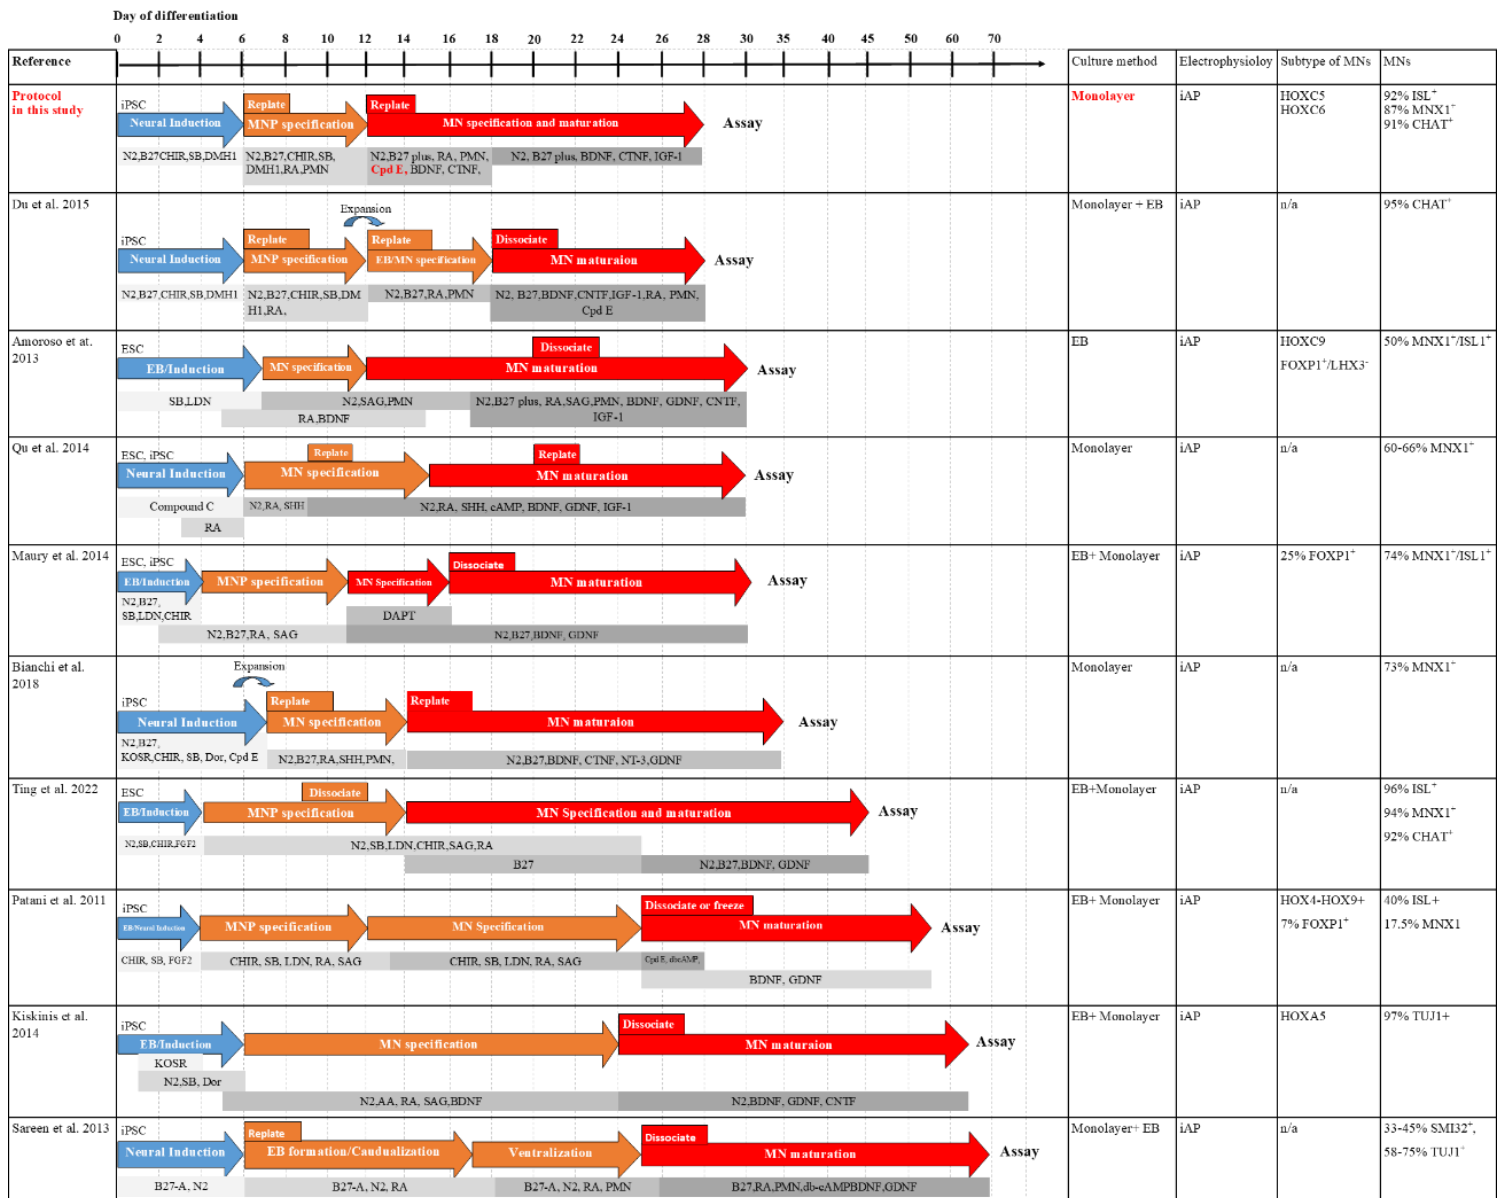

**Figure S1. Comparison of Published sMN Differentiation Protocols.** Ten protocols of iPSC-sMN differentiation were compared with respect to time (days in vitro). The end of the experiment (Assay) was based on the latest data presented in respective publications. KOSR, N2 and B27-A are the culture mediums. The abbreviations and full names are: BDNF – brain-derived neurotrophic factor, CHIR – CHIR99021, Compound C – a chemical inhibitor of Activin and BMP signalling, Compound E – a  $\gamma$ -secretase and notch pathway inhibitor, CNTF –Ciliary neurotrophic factor, DAPT – a notch response inhibitor, DMH1 – specific BMP-antagonist, Dorsomorphin (Dor, also called compound C) – a BMP inhibitor, FGF2 – Fibroblast growth factor 2, GDNF – glial cell line-derived neurotrophic factor, IGF-1 – Insulin-like Growth Factor 1, LDN193189 (LDN) – selective antagonist of BMP receptor, NT-3 – Neurotrophin-3,

Purmorphamine (PMN) – an SHH agonist, retinoic acid (RA), retinoic acid receptor (RAR)/retinoid X receptors (RXR), SAG – Sonic hedgehog signaling agonist, SB431542 (SB) - a TGF- $\beta$ /SMAD inhibitor, SHH – Sonic Hedgehog. The right four columns listed a summary of results, including culture method (EB-embryoid body, indicating suspension culture and monolayer indicates adherent culture), induced action potentials (iAP), unique MN subtype markers observed which were expressed in the caudal spinal cord, including Hox family member C (HOXC9), Forkhead Box P1 (FOXP1), LIM Homeobox 3 (LHX3), and approximate yield of MNs which were based on the reported percentage of cells expressing HB9, ISL1 or CHAT.

**Figure S2**

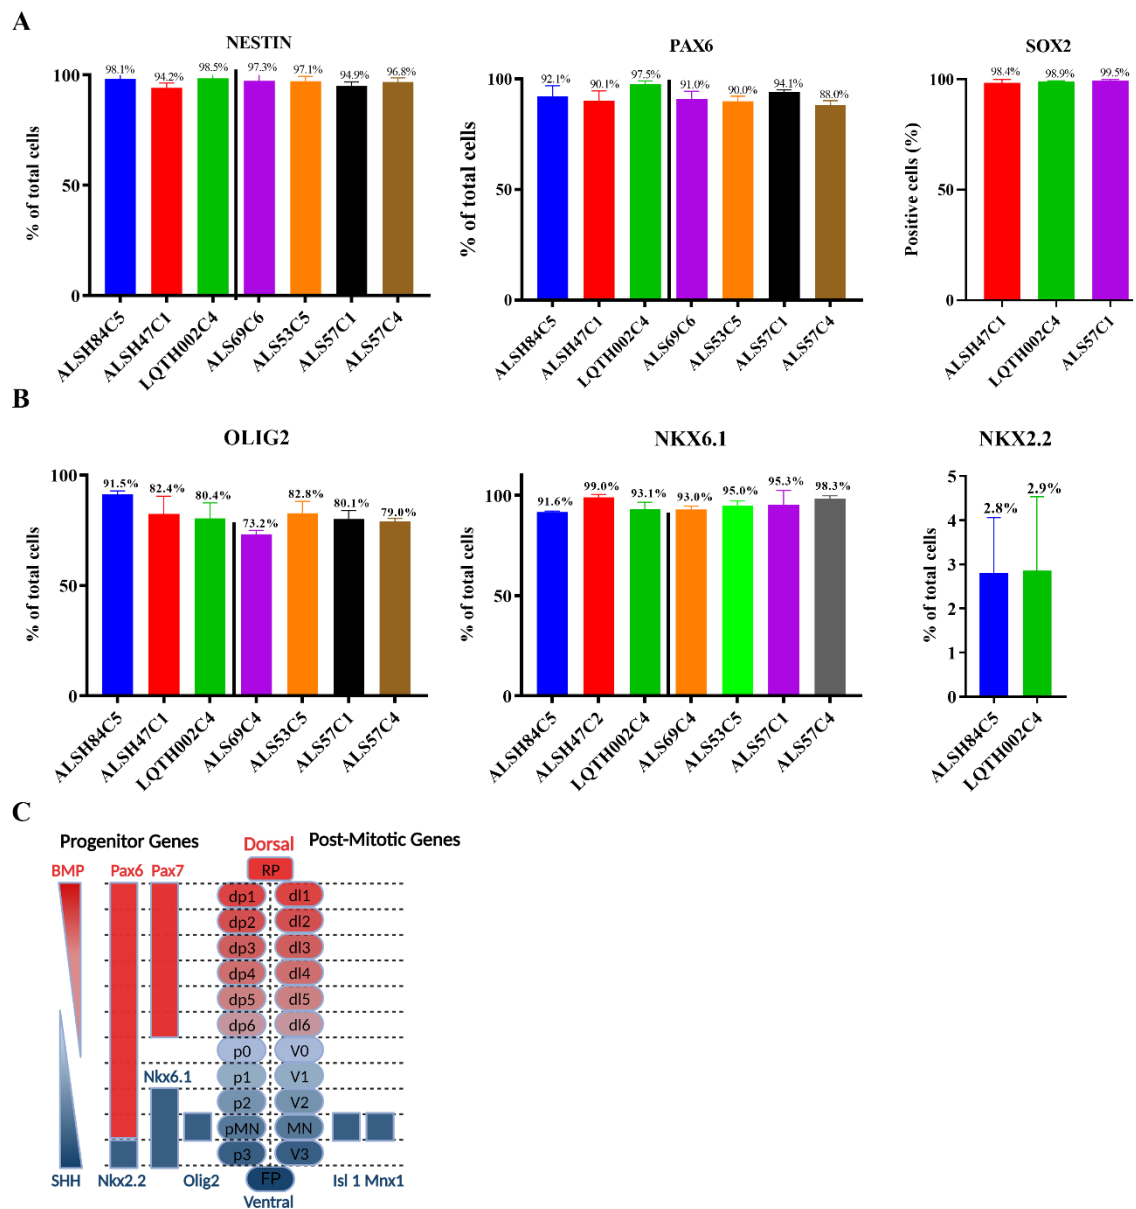

**Figure S2. The efficiency of NSC and MNP differentiation from multiple hPSC lines on day 6 and day 12. A)** The proportion of NESTIN<sup>+</sup>, PAX6<sup>+</sup>, and SOX2<sup>+</sup> cells on day 6 of differentiation. More than 600 cells from random fields were automatically counted by the Operetta High Content Imaging System in each cell line. **B) The efficiency of OLIG2<sup>+</sup>, NKX6.1<sup>+</sup> and NKX2.2<sup>-</sup> MNP differentiation from multiple hPSC lines on day 12. C)** Schematic showing the expression pattern of pMN domain markers in the developing spinal cord. Adapted from a reference (Sagner and Briscoe, 2019). Created with BioRender.com.

**Figure S3.**

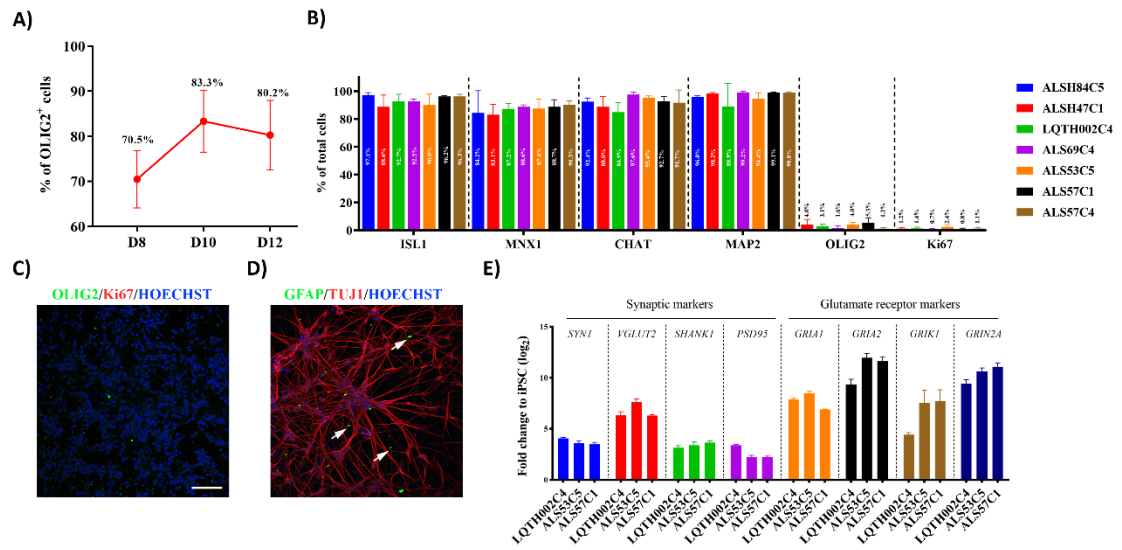

**Figure S3. Compound E can effectively drive the MNs to exit the cell cycle and convert OLIG2<sup>+</sup> MNP to pure mature sMNs.** **A)** Statistic analysis for the cells positive to OLIG2 from day 8 to day 12. N=3, n=3. **B)** The efficiency of ISL<sup>+</sup>, MNX1<sup>+</sup>, CHAT<sup>+</sup>, MAP2<sup>+</sup>, OLIG2<sup>+</sup>, Ki67<sup>+</sup> sMN differentiation from multiple hPSC lines on day 18. **C)** Representative images of double staining of OLIG2/Ki67 in iPSC-derived sMNs on day 18. **D)** Representative images of single staining of GFAP and TUJ1 in iPSC-derived sMNs on day 18. Arrows indicate the unspecific staining of GFAP. **E)** RT-qPCR analysis of synaptic excitatory markers of *SYN1*, *SHANK1* and *PSD-95*, vesicular glutamate transporter *VGLUT2*, and glutamatergic neuronal markers, including ionotropic AMPA receptors of *GRIA1* and *GRIA2*, NMDA receptors of *GRIN2A*, kainate receptors of *GRIK1* in iPSC-derived sMNs on day 18 compared to iPSC on day 0. N=3. Scale bar, 100µm.

**Table S1. Small molecules for spinal MN induction.**

| Involved stage            | Involved pathway                        | Name                             | Function                                                                              | Reference                                      |                        |
|---------------------------|-----------------------------------------|----------------------------------|---------------------------------------------------------------------------------------|------------------------------------------------|------------------------|
| Neural induction          | Wnt activator                           | CHIR99021                        | Inhibit GSK3, Promote ectoderm generation and caudalization                           | (Du et al., 2015; Nordström et al., 2002)      |                        |
|                           | Activin/TGFβ inhibitor                  | SB431542                         | Dual SMAD inhibition for neural induction                                             | (Chambers et al. 2009)                         |                        |
|                           |                                         | BMP inhibitor                    |                                                                                       | Noggin                                         | (Chambers et al. 2009) |
|                           |                                         |                                  |                                                                                       | DMH1                                           | (Du et al., 2015)      |
|                           |                                         |                                  |                                                                                       | LDN                                            | (Maury et al., 2015)   |
| Compound C (Dorsomorphin) | Block both Activin/TGFβ and BMP pathway | (Zhou et al., 2010)              |                                                                                       |                                                |                        |
| MN caudalization          | Retinoid acid                           | All trans-Retinoid acid          | Caudalizing NSCs                                                                      | (Chambers et al. 2009)                         |                        |
| MN ventralization         | Sonic Hedgehog activator                | SHH protein                      | Ventralizing NSCs                                                                     | (Chambers et al. 2009)                         |                        |
|                           |                                         | SAG (SHH agonist)                |                                                                                       | (Gouti et al., 2014; Mak et al., 2012)         |                        |
|                           |                                         | Purmorphamine (PMN, SHH agonist) |                                                                                       | (Hu and Zhang, 2009; Mak et al., 2012)         |                        |
| MN maturation             | Notch pathway inhibitor                 | Compound E                       | Promote neurogenesis by inhibiting Notch signaling and repressing cell proliferation. | (Du et al., 2015)                              |                        |
|                           |                                         | DAPT                             |                                                                                       | (Ben-Shushan et al., 2015; Maury et al., 2015) |                        |

**Table S2. Information of cell lines used in the study.**

| <b>Status</b> | <b>Cell line</b>       | <b>Sex</b> | <b>Age</b> | <b>Ethnicity</b> |
|---------------|------------------------|------------|------------|------------------|
| Healthy       | NUIGi048-C (ALSH84C5)  | 29         | Male       | Caucasian        |
| Healthy       | NUIGi038-A (LQTH002C4) | 47         | Female     | Caucasian        |
| Healthy       | NUIGi049-A (ALSH47C1)  | 66         | Female     | Caucasian        |
| Sporadic ALS  | NUIGi044-B (ALS69C4)   | 44         | Male       | Caucasian        |
| Sporadic ALS  | NUIGi050-A (ALS53C5)   | 60         | Male       | Caucasian        |
| Sporadic ALS  | NUIGi051-A (ALS57C1)   | 56         | Female     | Caucasian        |
| Sporadic ALS  | NUIGi051-C (ALS57C4)   | 56         | Female     | Caucasian        |
